# Supplementary material for: Optimisation of bi-layer resist overhang structure formation and SiO2 sputter-deposition process for fabrication of gold multi-electrode array
Source: Royal Society of Chemistry journal article supplement (doi:10.1039/c4ra11746h), 2014-12-15
Supplement: c4ra11746h1.pdf [file c4ra11746h1.pdf]

## Supplementary Information

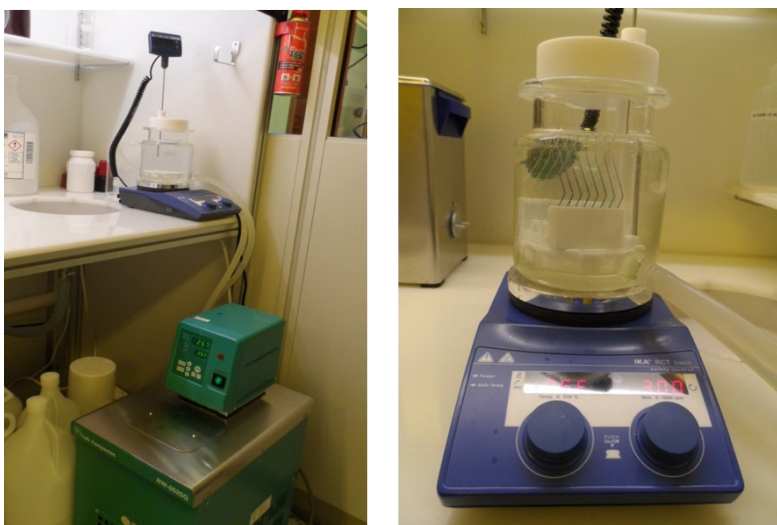

**Fig. S1** Photos of the experimental setup for precise develop temperature control. Develop solution was stirred with a magnetic spin bar rotating at 300 rpm.

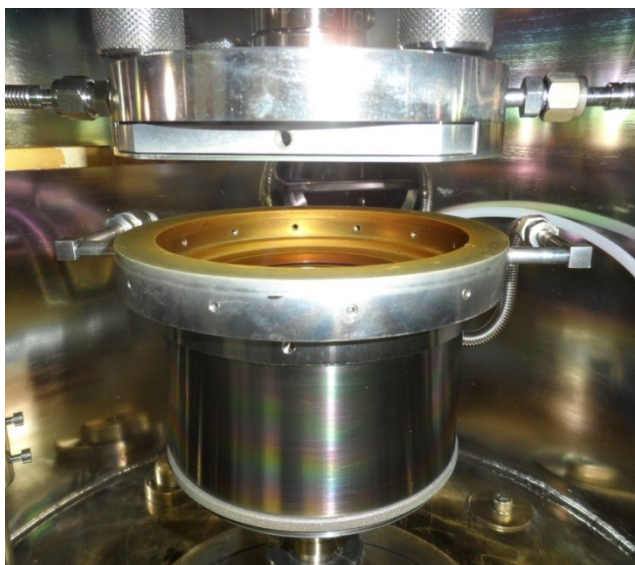

**Fig. S2** Photo of the gas delivery unit mounted on the sputter gun for uniform supply.

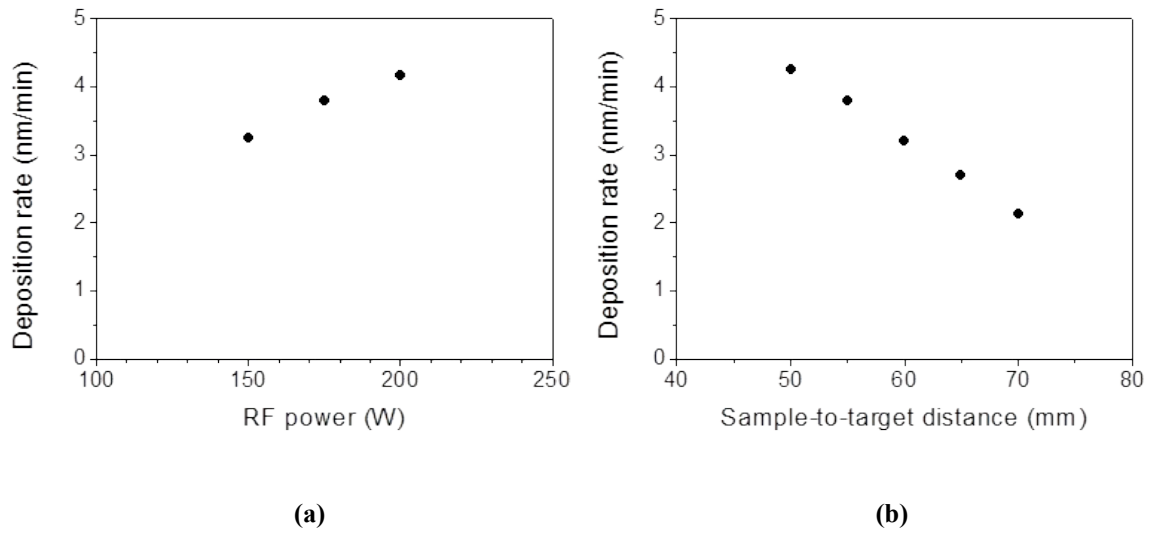

**Fig. S3** Dependence of the deposition rate on (a) RF power and (b) sample-to-target distance for sputter system used in this work.
